# Supplementary material for: Chirality dependent electromechanical properties of single-layer MoS2 under out-of-plane deformation: a DFT study
Source: Royal Society of Chemistry journal article supplement (doi:10.1039/d3cp04032a), 2023-01-01
Supplement: d3cp04032a1.pdf [file d3cp04032a1.pdf]

## Supplementary Information

### Chirality dependent electromechanical properties of single-layer MoS<sub>2</sub> under out-of-plane deformation: A DFT study

Faling Ling<sup>a, b\*</sup>, Yi Ling<sup>b</sup>, Xiaoqing Liu<sup>a</sup>, Li Li<sup>a</sup>, Xianju Zhou<sup>a</sup>, Xiao Tang<sup>a</sup>, Chuan Jing<sup>a</sup>, Yongjie Wang<sup>a</sup>, Sha Jiang<sup>a</sup>, Yi Lu<sup>b</sup>

<sup>a</sup>*School of Science, Chongqing University of Posts and Telecommunications, Chongqing, 400065, P. R. China*

<sup>b</sup>*Chongqing Key Laboratory of Photoelectronic Information Sensing and Transmitting Technology, School of Optoelectronic Engineering, Chongqing University of Posts and Telecommunications, Chongqing, 400065, P. R. China*

*E-mail: lingfl@cqupt.edu.cn (F. Ling)*

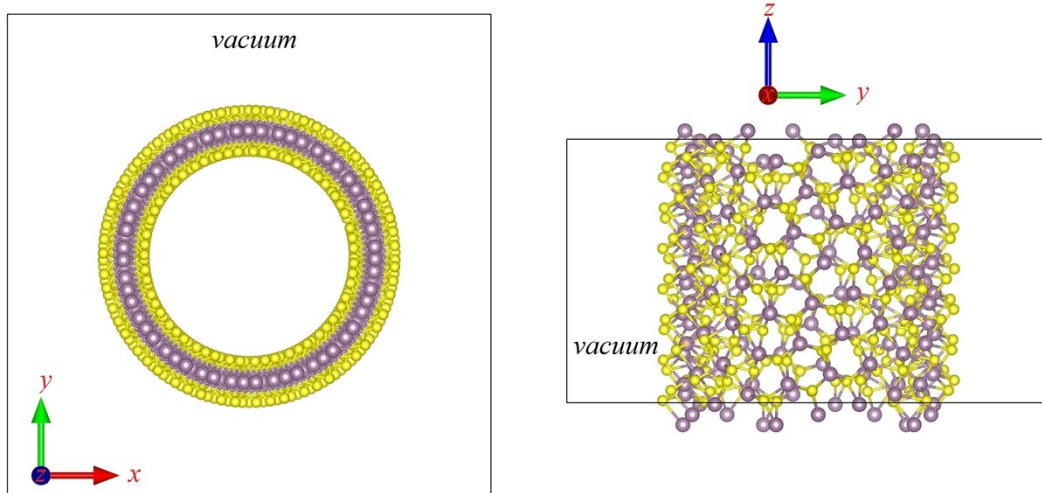

**Figure S1.** Top (left) and side (right) views of schematic of a MoS<sub>2</sub> nanotube.

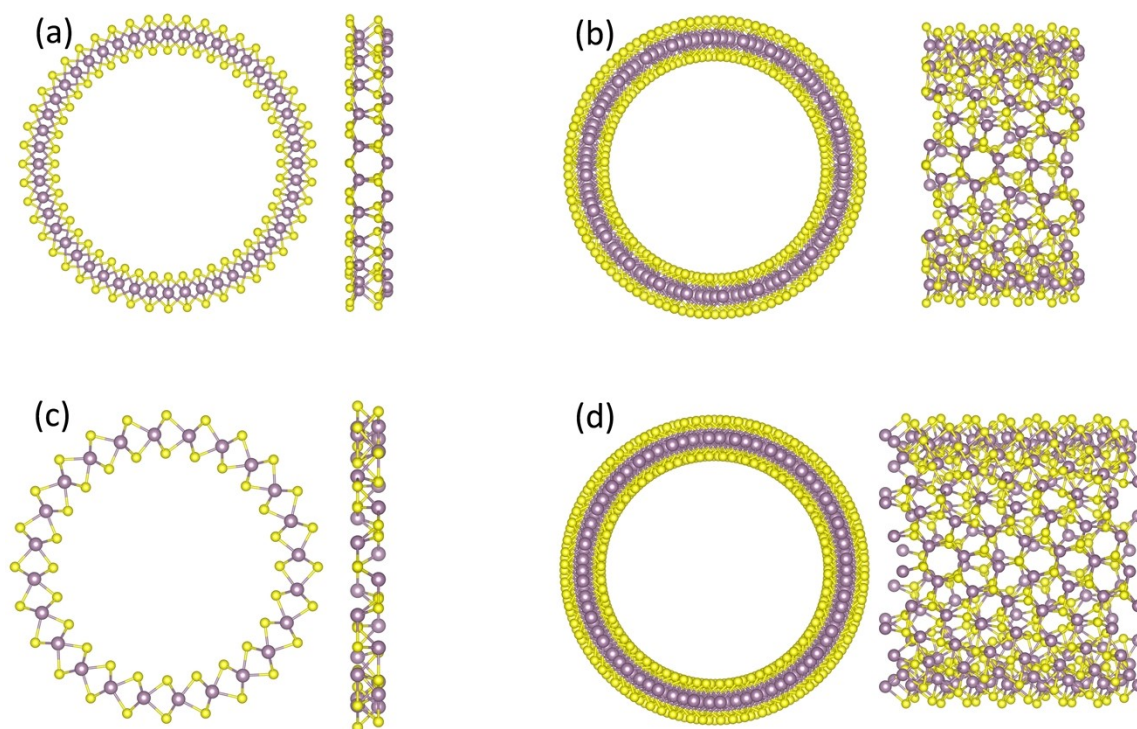

**Figure S2.** Top (left) and side (right) views of unit cells for (a) (1, 1), (b) (2, 1), (c) (3, 1) and (d) (4, 1) MoS<sub>2</sub> nanotube with a diameter of  $\sim 21$  Å.

**Table 1.** Number of atoms ( $N_{\text{atom}}$ ) and S-Mo bond lengths ( $\text{\AA}$ ) of MoS<sub>2</sub> nanotube models rolling along different in-plane directions as a dependence of diameters ( $\text{\AA}$ ).

| Tube-type | Diameter | $N_{\text{atom}}$ | S1-Mo | S2-Mo | S3-Mo | S4-Mo | S5-Mo | S6-Mo |
|-----------|----------|-------------------|-------|-------|-------|-------|-------|-------|
| (1, 1)    | 9.70     | 48                | 2.39  | 3.55  | 2.49  | 2.40  | 2.36  | 2.36  |
|           | 13.38    | 72                | 2.53  | 2.53  | 2.40  | 2.38  | 2.38  | 2.34  |
|           | 17.10    | 98                | 2.49  | 2.49  | 2.41  | 2.38  | 2.38  | 2.36  |
|           | 20.96    | 120               | 2.47  | 2.47  | 2.41  | 2.38  | 2.38  | 2.37  |
|           | 24.84    | 144               | 2.46  | 2.46  | 2.41  | 2.38  | 2.38  | 2.38  |
|           | 32.76    | 192               | 2.44  | 2.44  | 2.41  | 2.39  | 2.39  | 2.39  |
| (2, 1)    | 8.35     | 24                | 2.38  | 2.38  | 2.30  | 2.37  | 2.37  | 4.43  |
|           | 11.55    | 36                | 2.45  | 2.45  | 2.61  | 2.36  | 2.36  | 2.37  |
|           | 14.79    | 48                | 2.44  | 2.44  | 2.54  | 2.37  | 2.37  | 2.37  |
|           | 21.48    | 72                | 2.43  | 2.43  | 2.48  | 2.38  | 2.38  | 2.37  |
|           | 28.34    | 96                | 2.43  | 2.43  | 2.46  | 2.39  | 2.39  | 2.38  |
|           | 31.84    | 108               | 2.42  | 2.42  | 2.45  | 2.39  | 2.39  | 2.38  |
|           | 37.05    | 126               | 2.42  | 2.42  | 2.46  | 2.39  | 2.39  | 2.38  |
| (3, 1)    | 9.51     | 126               | 2.42  | 2.49  | 2.74  | 2.33  | 2.36  | 2.40  |
|           | 11.84    | 168               | 2.43  | 2.47  | 2.61  | 2.35  | 2.37  | 2.38  |
|           | 14.31    | 210               | 2.42  | 2.46  | 2.55  | 2.36  | 2.37  | 2.38  |
|           | 16.83    | 252               | 2.42  | 2.45  | 2.52  | 2.37  | 2.38  | 2.37  |
|           | 21.97    | 336               | 2.42  | 2.44  | 2.48  | 2.38  | 2.38  | 2.38  |
|           | 27.17    | 420               | 2.42  | 2.43  | 2.46  | 2.39  | 2.39  | 2.38  |
|           | 35.01    | 546               | 2.42  | 2.44  | 2.46  | 2.39  | 2.39  | 2.38  |
| (4, 1)    | 8.99     | 156               | 2.39  | 2.52  | 2.82  | 2.32  | 2.37  | 2.41  |
|           | 12.16    | 234               | 2.48  | 2.51  | 2.60  | 2.40  | 2.40  | 2.39  |
|           | 15.53    | 312               | 2.42  | 2.47  | 2.53  | 2.36  | 2.38  | 2.38  |
|           | 18.92    | 390               | 2.42  | 2.46  | 2.49  | 2.37  | 2.38  | 2.38  |
|           | 22.45    | 468               | 2.42  | 2.45  | 2.48  | 2.38  | 2.38  | 2.38  |
|           | 26.00    | 546               | 2.42  | 2.44  | 2.46  | 2.39  | 2.38  | 2.38  |
|           | 29.59    | 624               | 2.42  | 2.44  | 2.46  | 2.39  | 2.39  | 2.38  |
